# Supplementary material for: Exploring Dry-Film FTIR Spectroscopy to Characterize Milk Composition and Subclinical Ketosis throughout a Cow’s Lactation
Source: MDPI journal article supplement (doi:10.3390/foods10092033), 2021-08-29
Supplement: s1 [file s1]

Article

# Exploring dry-film FTIR spectroscopy to characterize milk composition and subclinical ketosis Throughout a cow's lactation

Amira Rachah, Olav Reksen, Valeria Tafintseva, Felicia Judith Marie Stehr, Elling-Olav Rukke, Adam Martin, Achim Kohler and Nils Kristian Afseth

## SUPPLEMENTARY FILE

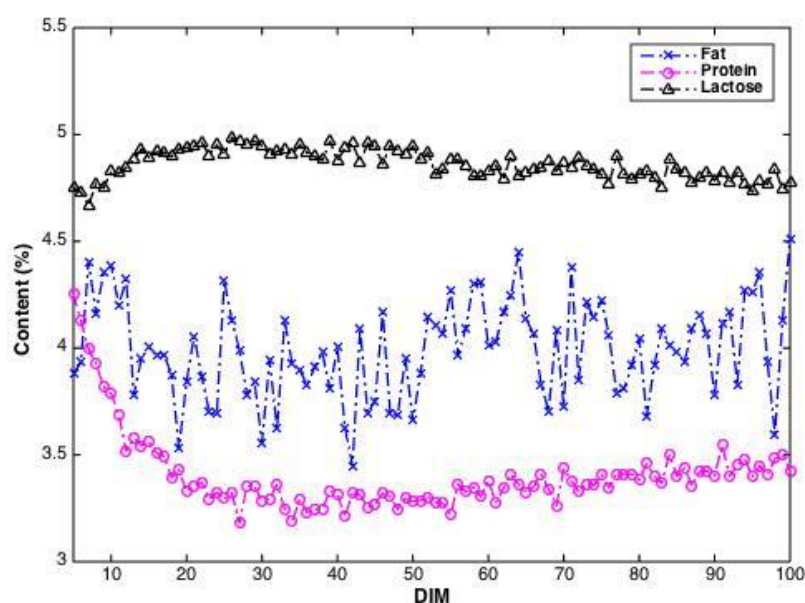

**Figure S1.** Corresponding plots of average chemical composition between DIM 5 and DIM 100

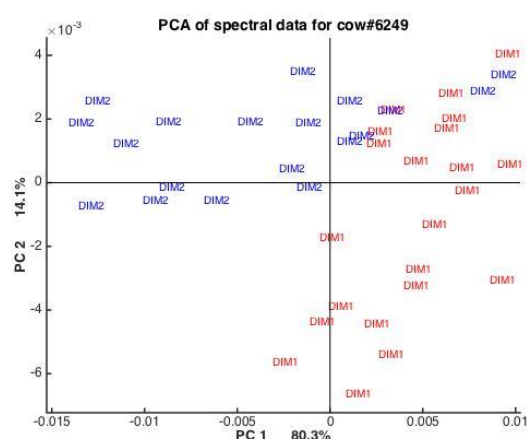

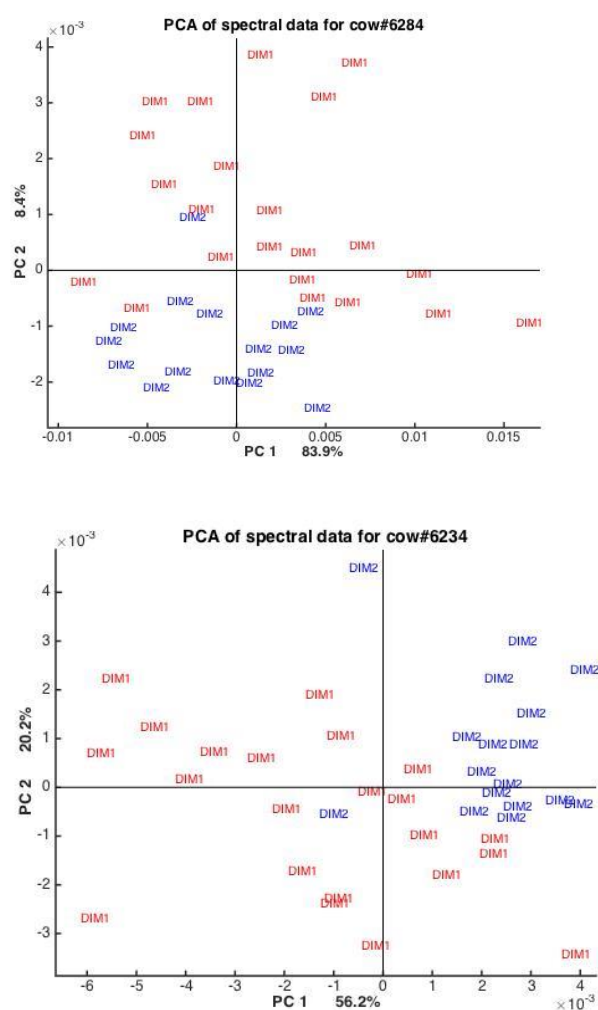

**Figure S2.** Score plots from PCA of FTIR spectra of milk from 3 randomly selected cows: DIM 1 (red color):  $5 \leq \text{DIM} \leq 50$  ; DIM 2 (blue color):  $50 < \text{DIM} \leq 100$ .

**Table S1.** Calibration and prediction results for fatty acid composition in milk samples. Data set A: 219 FTIR spectra from a previously published study were used to calibrate for fatty acid contents in milk; and data set B: 25 milk samples randomly selected from the current study.

| Fatty acid features | Calibration results (data set A+B;<br>n=244; segmented CV) |                |                  | Prediction results (data<br>set B; test set size: 25<br>samples) |                |                  |
|---------------------|------------------------------------------------------------|----------------|------------------|------------------------------------------------------------------|----------------|------------------|
|                     | RMSECV                                                     | R <sup>2</sup> | PLS fac-<br>tors | RMSEP                                                            | R <sup>2</sup> | PLS fac-<br>tors |
| C10:0               | 0.14                                                       | 0.94           | 11               | 0.16                                                             | 0.91           | 16               |
| C14:0               | 0.43                                                       | 0.85           | 9                | 0.45                                                             | 0.72           | 6                |
| C16:0               | 0.80                                                       | 0.92           | 11               | 1.20                                                             | 0.74           | 17               |
| C18:0               | 0.52                                                       | 0.87           | 14               | 0.70                                                             | 0.63           | 14               |
| C18:1cis-9          | 0.55                                                       | 0.96           | 10               | 0.64                                                             | 0.91           | 10               |
| CLA                 | 0.08                                                       | 0.83           | 16               | 0.10                                                             | 0.32           | 1                |
| SFA                 | 0.75                                                       | 0.96           | 10               | 0.96                                                             | 0.88           | 14               |
| MUFA                | 0.55                                                       | 0.97           | 10               | 0.88                                                             | 0.85           | 10               |
| PUFA                | 0.15                                                       | 0.77           | 18               | 0.18                                                             | 0.32           | 5                |

Table S2. Classification results: all 2329 samples classified by SPLSDA model as DIM1 vs DIM2. Number of spectra as well as percent of samples classified are provided. Overall mode accuracy = 78.0%.

| Predicted class<br>True class | DIM1      |  | DIM2     |
|-------------------------------|-----------|--|----------|
| DIM1 (Total=1289)             | 1000, 78% |  | 289, 22% |
| DIM2 (Total=1040)             | 223, 21%  |  | 817, 79% |

Table S3. Classification results: 895 samples of PAR1 group classified by SPLSDA model as DIM1 vs DIM2. Number of spectra as well as percent of samples classified are provided. Overall mode accuracy = 79.3%.

| Predicted class<br>True class | DIM1     | DIM2     |
|-------------------------------|----------|----------|
| DIM1 (Total=486)              | 375, 77% | 111, 23% |
| DIM2 (Total=409)              | 74, 18%  | 335, 82% |

Table S4. Classification results: 608 samples of PAR2 group classified by SPLSDA model as DIM1 vs DIM2. Number of spectra as well as percent of samples classified are provided. Overall mode accuracy = 74.3%.

| Predicted class<br>True class | DIM1     | DIM2     |
|-------------------------------|----------|----------|
| DIM1 (Total=334)              | 239, 72% | 95, 28%  |
| DIM2 (Total=274)              | 61, 22%  | 213, 78% |

Table S5. Classification results: 826 samples of PAR>2 group classified by SPLSDA model as DIM1 vs DIM2. Number of spectra as well as percent of samples classified are provided. Overall mode accuracy = 81.0%.

| Predicted class<br>True class | DIM1     | DIM2     |
|-------------------------------|----------|----------|
| DIM1 (Total=469)              | 388, 83% | 81, 17%  |
| DIM2 (Total=357)              | 76, 21%  | 281, 79% |
